# Supplementary material
Source: Springer Nature journal article supplement (https://www.springermedizin.de/resource/supplementary/13063_2010_534_MOESM3_ESM.pdf/9618180)

After giving written informed consent

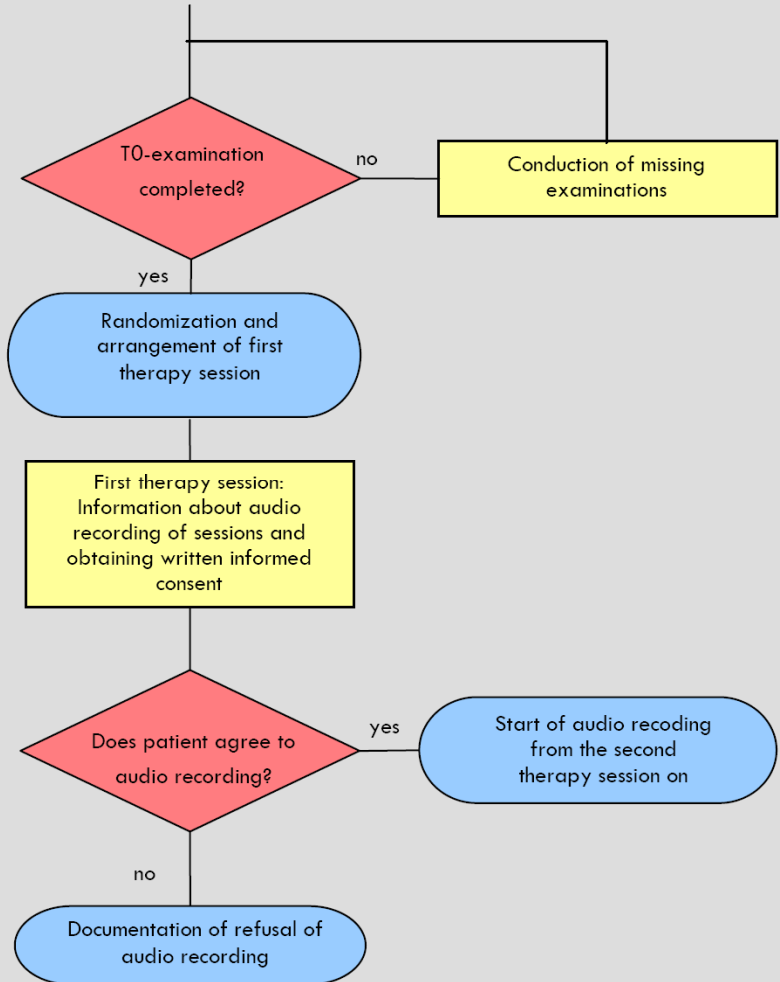

Supplement: MOESM3 [file 9618180]
